# Supplementary material
Source: Research Square preprint supplement (doi:10.21203/rs.3.rs-9533511/v1)
Supplement: Supplementary file 1 [file 722e41a67a1a392db2a9bc3b.xlsx]

## Sheet: Expert_AHP_Pairwise
Expert_ID	Row_Criterion	vs_Symbolic Clarity	vs_Contextual Fitness	vs_Craft & Maintainability	vs_Identification	vs_Narrative Capacity	Individual_Weight	Lambda_max	CI	CR
E01	Symbolic Clarity	1	1.154	1.3887	2.1819	2.0813	0.2879	5.0163	0.004075	0.003638
E01	Contextual Fitness	0.8666	1	1.1305	1.3029	1.4358	0.2182
E01	Craft & Maintainability	0.7201	0.8846	1	1.2959	1.4885	0.2008
E01	Identification	0.4583	0.7675	0.7716	1	1.2971	0.1571
E01	Narrative Capacity	0.4805	0.6965	0.6718	0.771	1	0.136
E02	Symbolic Clarity	1	1.4783	1.622	2.7745	2.7668	0.3314	5.0047	0.001166	0.001041
E02	Contextual Fitness	0.6764	1	1.0378	1.8039	1.7812	0.2178
E02	Craft & Maintainability	0.6165	0.9635	1	1.7593	1.9118	0.2125
E02	Identification	0.3604	0.5544	0.5684	1	1.2022	0.1244
E02	Narrative Capacity	0.3614	0.5614	0.5231	0.8318	1	0.114
E03	Symbolic Clarity	1	1.0705	2.1389	1.7184	2.0919	0.2897	5.0603	0.015064	0.01345
E03	Contextual Fitness	0.9341	1	1.5264	1.654	1.4517	0.2447
E03	Craft & Maintainability	0.4675	0.6552	1	0.9965	0.9023	0.1476
E03	Identification	0.582	0.6046	1.0035	1	1.8612	0.1784
E03	Narrative Capacity	0.478	0.6888	1.1083	0.5373	1	0.1395
E04	Symbolic Clarity	1	1.292	1.4729	1.894	1.905	0.2848	5.0005	0.000129	0.000115
E04	Contextual Fitness	0.774	1	1.1565	1.4854	1.5482	0.2238
E04	Craft & Maintainability	0.6789	0.8647	1	1.3532	1.3073	0.1952
E04	Identification	0.528	0.6732	0.739	1	1.0248	0.149
E04	Narrative Capacity	0.5249	0.6459	0.7649	0.9758	1	0.1472
E05	Symbolic Clarity	1	1.342	1.5252	1.856	2.5526	0.3035	5.0136	0.00341	0.003044
E05	Contextual Fitness	0.7452	1	1.28	1.4138	1.3831	0.218
E05	Craft & Maintainability	0.6556	0.7813	1	0.9863	1.2764	0.1762
E05	Identification	0.5388	0.7073	1.0139	1	1.1939	0.1646
E05	Narrative Capacity	0.3918	0.723	0.7835	0.8376	1	0.1376
E06	Symbolic Clarity	1	1.2038	2.061	1.9773	1.3112	0.2801	5.048	0.012012	0.010725
E06	Contextual Fitness	0.8307	1	1.1702	1.3519	1.6784	0.2296
E06	Craft & Maintainability	0.4852	0.8546	1	0.9939	0.6874	0.1511
E06	Identification	0.5057	0.7397	1.0061	1	0.8019	0.1517
E06	Narrative Capacity	0.7626	0.5958	1.4548	1.247	1	0.1876
E07	Symbolic Clarity	1	1.2601	1.9488	1.6219	2.9625	0.3091	5.0061	0.001522	0.001359
E07	Contextual Fitness	0.7936	1	1.4247	1.1544	1.9269	0.227
E07	Craft & Maintainability	0.5131	0.7019	1	0.9317	1.4427	0.1632
E07	Identification	0.6166	0.8663	1.0733	1	1.886	0.1917
E07	Narrative Capacity	0.3376	0.519	0.6931	0.5302	1	0.1091
E08	Symbolic Clarity	1	1.065	1.5596	2.2153	2.1798	0.2856	5.0312	0.007802	0.006966
E08	Contextual Fitness	0.9389	1	1.4786	1.7984	1.8524	0.2565
E08	Craft & Maintainability	0.6412	0.6763	1	1.8299	1.7131	0.2014
E08	Identification	0.4514	0.5561	0.5465	1	1.3969	0.1363
E08	Narrative Capacity	0.4588	0.5399	0.5837	0.7159	1	0.1202
E09	Symbolic Clarity	1	1.1678	1.544	2.4136	1.6559	0.2835	5.0246	0.006155	0.005495
E09	Contextual Fitness	0.8563	1	1.4489	2.2492	1.7626	0.2626
E09	Craft & Maintainability	0.6477	0.6902	1	1.0118	0.9285	0.161
E09	Identification	0.4143	0.4446	0.9883	1	0.8903	0.1331
E09	Narrative Capacity	0.6039	0.5673	1.077	1.1232	1	0.1598
E10	Symbolic Clarity	1	0.9868	1.3283	2.5669	2.2453	0.2783	5.0311	0.007781	0.006947
E10	Contextual Fitness	1.0134	1	2.0711	2.3933	1.8571	0.2927
E10	Craft & Maintainability	0.7529	0.4828	1	1.7441	1.4086	0.1827
E10	Identification	0.3896	0.4178	0.5734	1	0.9959	0.1155
E10	Narrative Capacity	0.4454	0.5385	0.7099	1.0041	1	0.1308
E11	Symbolic Clarity	1	1.0261	1.4084	2.1815	1.6899	0.2726	5.0193	0.004816	0.0043
E11	Contextual Fitness	0.9745	1	1.2562	1.4411	1.288	0.2297
E11	Craft & Maintainability	0.71	0.796	1	1.3841	1.1309	0.1896
E11	Identification	0.4584	0.6939	0.7225	1	1.0634	0.1474
E11	Narrative Capacity	0.5917	0.7764	0.8843	0.9404	1	0.1607
E12	Symbolic Clarity	1	1.2017	1.3597	1.4165	1.9891	0.2639	5.0199	0.004976	0.004443
E12	Contextual Fitness	0.8322	1	1.3719	1.1339	1.6632	0.2271
E12	Craft & Maintainability	0.7354	0.7289	1	0.8974	1.6476	0.1867
E12	Identification	0.706	0.8819	1.1143	1	1.1487	0.1867
E12	Narrative Capacity	0.5027	0.6013	0.607	0.8705	1	0.1356
E13	Symbolic Clarity	1	1.2901	1.3047	1.6752	1.7215	0.268	5.0094	0.002354	0.002102
E13	Contextual Fitness	0.7752	1	0.9907	1.2952	1.4379	0.2096
E13	Craft & Maintainability	0.7664	1.0094	1	1.2566	1.4771	0.2097
E13	Identification	0.597	0.7721	0.7958	1	1.4318	0.1721
E13	Narrative Capacity	0.5809	0.6955	0.677	0.6984	1	0.1406
E14	Symbolic Clarity	1	1.8125	1.4406	2.5923	1.7508	0.312	5.0081	0.002034	0.001816
E14	Contextual Fitness	0.5517	1	0.8685	1.502	0.972	0.1774
E14	Craft & Maintainability	0.6941	1.1514	1	1.7975	1.4827	0.2216
E14	Identification	0.3858	0.6658	0.5563	1	0.7979	0.1233
E14	Narrative Capacity	0.5712	1.0288	0.6744	1.2533	1	0.1658
E15	Symbolic Clarity	1	1.374	1.3045	1.888	2.2523	0.288	5.0046	0.001157	0.001033
E15	Contextual Fitness	0.7278	1	1.1566	1.4424	1.8038	0.2245
E15	Craft & Maintainability	0.7666	0.8646	1	1.4084	1.6799	0.2099
E15	Identification	0.5297	0.6933	0.71	1	1.0767	0.1488
E15	Narrative Capacity	0.444	0.5544	0.5953	0.9288	1	0.1287
E16	Symbolic Clarity	1	1.2246	1.5481	2.0301	2.8744	0.3074	5.007	0.001753	0.001565
E16	Contextual Fitness	0.8166	1	1.2032	1.4398	1.8517	0.2301
E16	Craft & Maintainability	0.646	0.8311	1	1.2201	1.5078	0.1892
E16	Identification	0.4926	0.6945	0.8196	1	1.1721	0.1519
E16	Narrative Capacity	0.3479	0.54	0.6632	0.8532	1	0.1214
E17	Symbolic Clarity	1	1.4522	1.3104	2.4139	1.3935	0.2809	5.0267	0.006683	0.005967
E17	Contextual Fitness	0.6886	1	1.1947	1.8038	1.2764	0.2195
E17	Craft & Maintainability	0.7631	0.837	1	1.5714	0.9307	0.1908
E17	Identification	0.4143	0.5544	0.6364	1	0.9023	0.1295
E17	Narrative Capacity	0.7176	0.7834	1.0744	1.1082	1	0.1793
E18	Symbolic Clarity	1	1.0321	1.4419	1.4443	2.8612	0.2709	5.0028	0.000702	0.000627
E18	Contextual Fitness	0.9689	1	1.3638	1.6141	2.5556	0.2645
E18	Craft & Maintainability	0.6935	0.7332	1	1.0631	1.8921	0.1891
E18	Identification	0.6924	0.6195	0.9406	1	1.7816	0.1764
E18	Narrative Capacity	0.3495	0.3913	0.5285	0.5613	1	0.0992
E19	Symbolic Clarity	1	1.0976	2.2955	1.8423	2.42	0.3078	5.0341	0.00852	0.007607
E19	Contextual Fitness	0.9111	1	1.2784	1.8216	1.7451	0.2456
E19	Craft & Maintainability	0.4356	0.7822	1	1.1004	1.6842	0.1732
E19	Identification	0.5428	0.549	0.9087	1	1.2301	0.1511
E19	Narrative Capacity	0.4132	0.573	0.5938	0.8129	1	0.1224
E20	Symbolic Clarity	1	1.1597	1.4485	1.691	2.1325	0.2717	5.0256	0.006403	0.005717
E20	Contextual Fitness	0.8623	1	1.3995	2.3265	2.5602	0.2823
E20	Craft & Maintainability	0.6904	0.7146	1	1.1202	1.3232	0.1777
E20	Identification	0.5914	0.4298	0.8927	1	1.0999	0.1435
E20	Narrative Capacity	0.4689	0.3906	0.7558	0.9092	1	0.1248
E21	Symbolic Clarity	1	0.9583	1.243	1.3759	1.5106	0.2341	5.0052	0.001301	0.001162
E21	Contextual Fitness	1.0435	1	1.4009	1.6089	1.873	0.2626
E21	Craft & Maintainability	0.8045	0.7138	1	1.1535	1.3487	0.1907
E21	Identification	0.7268	0.6216	0.8669	1	1.3265	0.1713
E21	Narrative Capacity	0.662	0.5339	0.7415	0.7538	1	0.1413
E22	Symbolic Clarity	1	1.0312	1.2561	1.7921	1.7906	0.2574	5.0036	0.000894	0.000798
E22	Contextual Fitness	0.9698	1	1.1478	1.6206	1.7263	0.2429
E22	Craft & Maintainability	0.7961	0.8712	1	1.5947	1.5342	0.2153
E22	Identification	0.558	0.6171	0.6271	1	1.1355	0.1462
E22	Narrative Capacity	0.5585	0.5793	0.6518	0.8807	1	0.1383
E23	Symbolic Clarity	1	1.1262	1.3474	1.4735	2.0473	0.2636	5.0101	0.002519	0.002249
E23	Contextual Fitness	0.8879	1	0.9524	1.4315	1.7653	0.2263
E23	Craft & Maintainability	0.7422	1.05	1	1.4051	1.4257	0.2129
E23	Identification	0.6787	0.6986	0.7117	1	1.203	0.1623
E23	Narrative Capacity	0.4884	0.5665	0.7014	0.8313	1	0.135
E24	Symbolic Clarity	1	1.6429	2.2099	2.7388	2.5796	0.3564	5.0229	0.005729	0.005116
E24	Contextual Fitness	0.6087	1	1.3743	1.2546	1.3925	0.2015
E24	Craft & Maintainability	0.4525	0.7277	1	1.4428	1.0151	0.162
E24	Identification	0.3651	0.7971	0.6931	1	1.099	0.1388
E24	Narrative Capacity	0.3877	0.7181	0.9851	0.9099	1	0.1414
E25	Symbolic Clarity	1	1.4947	1.6285	1.9092	1.6985	0.294	5.0048	0.001212	0.001082
E25	Contextual Fitness	0.669	1	1.1331	1.4543	1.2114	0.2063
E25	Craft & Maintainability	0.6141	0.8825	1	1.0626	1.1108	0.1779
E25	Identification	0.5238	0.6876	0.9411	1	0.9975	0.1568
E25	Narrative Capacity	0.5887	0.8255	0.9002	1.0025	1	0.165

## Sheet: Expert_AHP_Group
Criterion	Symbolic Clarity	Contextual Fitness	Craft & Maintainability	Identification	Narrative Capacity	Priority_Weight
Symbolic Clarity	1	1.2216	1.5391	1.9467	2.0476	0.2883
Contextual Fitness	0.8186	1	1.253	1.561	1.6353	0.2336
Craft & Maintainability	0.6497	0.7981	1	1.265	1.3315	0.1876
Identification	0.5137	0.6406	0.7905	1	1.17	0.152
Narrative Capacity	0.4884	0.6115	0.751	0.8547	1	0.1386
Metric	Computed	Paper_Reported
Lambda_max	5.0015	5.0011
CI	0.000364	0.000270
CR	0.000325	0.000241
RI (n=5)	1.12	1.12
Kendall's W	0.8752	-
N_Experts	25	25
All CR < 0.10	Yes	Yes
Criterion	Computed	Paper_Target
Symbolic Clarity	0.2883	0.288
Contextual Fitness	0.2336	0.229
Craft & Maintainability	0.1876	0.188
Identification	0.152	0.158
Narrative Capacity	0.1386	0.137

## Sheet: Expert_Scoring
Expert_ID	Alternative	Symbolic Clarity	Contextual Fitness	Craft & Maintainability	Identification	Narrative Capacity
E01	Brooch A	4	3.5	3.5	4	4
E01	Brooch B	4.5	4	4	4.5	3
E02	Brooch A	5	3.5	3.5	5	4.5
E02	Brooch B	3	4	5	4	3.5
E03	Brooch A	4.5	4.5	4	3.5	3.5
E03	Brooch B	4	4.5	3	3.5	4
E04	Brooch A	4.5	3.5	5	3	4.5
E04	Brooch B	3	4	4	4	3.5
E05	Brooch A	5	4	2.5	4.5	4
E05	Brooch B	4	3.5	4	3.5	4
E06	Brooch A	5	5	5	4	5
E06	Brooch B	3	4.5	4.5	4.5	3
E07	Brooch A	5	3.5	4	4.5	4.5
E07	Brooch B	3.5	4	4	3.5	2.5
E08	Brooch A	5	4.5	3.5	4	4
E08	Brooch B	3	4	4	3.5	3.5
E09	Brooch A	3.5	4	4	4	4.5
E09	Brooch B	4.5	5	4	5	4.5
E10	Brooch A	3.5	3.5	4.5	4	5
E10	Brooch B	3	4	4	4.5	4
E11	Brooch A	4	2.5	4	4.5	3.5
E11	Brooch B	3.5	4.5	3.5	4.5	2.5
E12	Brooch A	3.5	3	4.5	3.5	4.5
E12	Brooch B	3.5	4	3	4	4
E13	Brooch A	3.5	3.5	4	3.5	5
E13	Brooch B	4.5	5	3.5	5	3
E14	Brooch A	5	4	4.5	4.5	4.5
E14	Brooch B	4	4	4	3	4
E15	Brooch A	4	3.5	3.5	4.5	4
E15	Brooch B	4	4	4	4.5	3
E16	Brooch A	4.5	4	4.5	4	4.5
E16	Brooch B	3.5	4	3	4	3
E17	Brooch A	4.5	4	4	5	5
E17	Brooch B	3	4.5	4.5	4	3.5
E18	Brooch A	4.5	3	4.5	4	4.5
E18	Brooch B	4	3	4	4.5	4
E19	Brooch A	4.5	5	4	3.5	4.5
E19	Brooch B	3	3.5	4	4	3.5
E20	Brooch A	4.5	3.5	5	4	4
E20	Brooch B	3.5	4.5	4.5	3	4
E21	Brooch A	4.5	4	4	4	4.5
E21	Brooch B	4.5	4.5	4.5	4	2.5
E22	Brooch A	3.5	5	4	4	5
E22	Brooch B	2.5	4	3.5	3.5	3.5
E23	Brooch A	4	4	4.5	4	4.5
E23	Brooch B	3.5	5	4.5	3	5
E24	Brooch A	4.5	4	3.5	4	4.5
E24	Brooch B	4	4.5	4	4	3.5
E25	Brooch A	4	4	4	4.5	4.5
E25	Brooch B	3.5	4	5	3	3.5
MEAN	Brooch A	4.32	3.86	4.08	4.08	4.42
MEAN	Brooch B	3.6	4.18	4	3.94	3.52
SD	Brooch A	0.538	0.621	0.572	0.472	0.425
SD	Brooch B	0.577	0.476	0.54	0.601	0.62
Paper_Target	Brooch A	4.3	3.9	4.1	4.1	4.4
Paper_Target	Brooch B	3.6	4.2	4	3.9	3.5

## Sheet: User_Survey_Raw
Respondent_ID	Age_Group	Gender	Region	Familiarity	Education	Symbolic_Q1	Symbolic_Q2	Symbolic_Q3	Symbolic_Q4	Narrative_Q1	Narrative_Q2	Narrative_Q3	Narrative_Q4	Context_Q1	Context_Q2	Context_Q3	Craft_Q1	Craft_Q2	Craft_Q3	Coherence_Q1	Coherence_Q2	Coherence_Q3	Coherence_Q4	Preference_BroochA	Preference_BroochB
U001	56+	Female	Other	Low	Master	4	4	3	3	4	4	5	3	4	4	4	3	3	3	3	3	4	3	4	2
U002	18-25	Male	Eastern China	Low	Master	2	4	3	4	4	2	4	2	4	3	3	3	4	3	3	3	4	4	4	3
U003	18-25	Male	Other Southwest	Low	Master	3	4	3	4	4	3	3	4	4	4	5	4	5	5	4	4	5	4	5	3
U004	18-25	Female	Guizhou	Medium	Bachelor	4	5	5	4	2	4	5	4	4	4	4	5	5	4	3	2	4	5	5	2
U005	46-55	Male	Northern China	Medium	Bachelor	4	3	4	4	4	4	4	2	4	5	5	3	2	3	3	3	4	3	3	3
U006	36-45	Female	Northern China	High	Bachelor	4	3	3	3	5	5	4	5	3	3	4	5	5	5	4	5	4	3	4	4
U007	36-45	Female	Guizhou	Low	Bachelor	4	2	3	4	3	4	4	4	4	4	4	5	4	4	5	5	5	4	4	3
U008	26-35	Female	Eastern China	Low	PhD	2	2	2	3	2	2	3	2	4	3	4	3	4	3	4	4	3	3	3	4
U009	46-55	Male	Other	Low	PhD	3	3	3	3	3	4	4	4	2	2	2	3	3	3	5	4	4	4	4	4
U010	26-35	Male	Eastern China	High	Bachelor	4	2	4	4	3	3	2	3	3	3	3	4	4	3	2	4	2	1	4	2
U011	18-25	Female	Other	High	Master	4	3	2	3	4	4	5	3	4	3	3	5	5	4	4	2	3	3	4	4
U012	46-55	Male	Other	Medium	Bachelor	3	3	2	3	4	3	3	4	2	3	2	3	3	3	4	3	3	4	5	4
U013	46-55	Male	Northern China	Low	Bachelor	3	2	3	3	3	2	2	3	4	4	5	3	3	3	4	4	4	5	5	3
U014	36-45	Female	Other Southwest	Low	Bachelor	1	3	3	2	3	2	3	2	3	4	5	4	4	4	4	4	3	5	3	4
U015	26-35	Male	Guizhou	High	Bachelor	3	3	3	3	2	5	3	4	3	3	1	3	3	4	5	3	3	3	5	3
U016	18-25	Female	Eastern China	Low	Bachelor	3	3	4	3	3	4	3	3	3	3	4	3	4	2	2	3	3	3	4	2
U017	36-45	Female	Eastern China	Medium	PhD	5	5	5	4	4	4	4	5	3	3	3	3	4	4	3	3	4	4	4	2
U018	26-35	Female	Other Southwest	Low	Bachelor	4	3	3	2	4	5	4	3	5	4	5	3	3	3	3	2	3	3	3	3
U019	18-25	Female	Eastern China	Low	Bachelor	5	5	4	5	3	4	5	4	3	4	3	2	1	2	4	4	4	4	4	3
U020	18-25	Female	Guizhou	Low	Master	4	3	2	3	3	3	2	4	3	5	5	2	1	2	3	4	5	4	5	3
U021	56+	Female	Other Southwest	High	Bachelor	4	4	3	4	4	5	4	4	5	4	5	3	3	4	4	3	4	4	5	4
U022	18-25	Female	Northern China	Medium	Master	4	3	3	3	2	2	2	2	4	4	4	4	4	3	3	5	5	5	2	2
U023	56+	Female	Northern China	Medium	Bachelor	5	4	4	4	5	5	4	4	5	5	5	2	3	2	4	3	4	3	4	4
U024	36-45	Female	Eastern China	Low	Bachelor	2	3	2	3	5	4	3	4	4	4	4	3	3	2	3	3	2	2	4	3
U025	36-45	Male	Northern China	Medium	Master	3	3	3	3	3	2	2	2	3	4	4	3	3	4	4	4	4	3	5	4
U026	18-25	Female	Guizhou	Low	Bachelor	5	5	3	5	3	2	4	2	3	4	3	2	2	2	3	5	3	3	4	3
U027	46-55	Male	Eastern China	High	Bachelor	2	3	4	3	4	2	3	3	4	4	4	4	3	4	3	3	3	3	5	3
U028	26-35	Female	Other	Low	Bachelor	2	3	3	3	4	5	5	5	3	4	3	2	3	3	4	2	4	4	4	3
U029	46-55	Male	Eastern China	Low	Bachelor	4	3	3	4	2	3	2	2	3	3	3	3	2	3	3	3	3	2	3	5
U030	26-35	Male	Other	Low	Master	3	4	2	3	3	4	4	4	2	3	2	2	2	2	2	2	3	3	3	4
U031	18-25	Female	Other	Low	Bachelor	3	2	3	4	4	3	3	3	5	3	4	4	5	5	2	3	3	3	3	4
U032	46-55	Female	Eastern China	High	Bachelor	5	4	5	4	3	4	4	5	4	4	4	3	3	3	4	4	4	5	5	5
U033	36-45	Male	Eastern China	Low	Bachelor	3	1	2	2	4	4	2	3	3	2	3	4	3	4	3	3	4	4	4	4
U034	46-55	Female	Guizhou	Medium	Bachelor	3	3	4	3	4	4	4	4	5	4	3	4	4	4	3	2	3	3	3	3
U035	36-45	Male	Eastern China	Medium	Master	5	5	3	5	3	2	4	3	4	3	4	3	4	4	4	5	4	4	5	4
U036	18-25	Female	Guizhou	Medium	Bachelor	3	2	4	3	3	4	5	4	4	4	4	4	4	3	5	4	4	4	2	2
U037	18-25	Male	Other Southwest	Low	Bachelor	3	4	4	4	1	4	3	2	4	4	3	4	2	2	3	3	4	3	3	4
U038	18-25	Female	Guizhou	Medium	Bachelor	4	4	3	3	3	3	3	3	4	5	4	2	4	4	4	4	4	4	4	4
U039	36-45	Female	Northern China	Low	Bachelor	5	5	4	4	2	4	3	2	4	5	4	3	3	3	4	4	5	4	3	4
U040	46-55	Female	Guizhou	Medium	Bachelor	4	4	5	4	2	2	2	3	4	4	3	3	3	2	3	3	4	4	4	4
U041	46-55	Female	Guizhou	Low	PhD	4	3	3	4	3	3	3	2	4	4	3	3	4	5	3	4	3	2	5	3
U042	18-25	Male	Eastern China	High	Bachelor	3	3	3	3	4	5	4	4	3	3	4	3	2	4	3	3	4	4	5	2
U043	18-25	Female	Other	High	Bachelor	5	5	5	4	4	5	4	4	3	3	3	4	4	5	4	5	5	5	3	4
U044	18-25	Female	Northern China	Low	Bachelor	2	3	3	3	3	1	4	1	2	2	2	4	3	3	3	3	4	2	3	4
U045	56+	Male	Eastern China	Low	Bachelor	4	3	3	3	2	2	3	3	3	4	5	4	5	4	4	3	3	3	5	3
U046	36-45	Male	Other	Low	Bachelor	4	3	3	3	4	4	5	4	4	4	4	2	1	1	3	4	3	5	3	3
U047	26-35	Male	Other	Low	PhD	2	1	1	2	3	3	4	4	5	4	5	3	4	3	3	3	2	2	5	4
U048	36-45	Female	Eastern China	Low	Bachelor	4	4	3	4	4	4	3	3	4	4	3	3	2	3	4	3	4	5	5	3
U049	26-35	Male	Other Southwest	Medium	Master	4	4	3	3	4	3	2	3	2	4	2	3	3	4	4	4	4	4	4	4
U050	36-45	Male	Eastern China	Low	Master	3	3	5	3	2	2	3	3	4	4	4	3	4	3	4	5	3	4	3	4
U051	18-25	Male	Other Southwest	Medium	Master	4	4	5	3	2	2	3	2	3	3	3	4	3	3	4	2	3	3	5	4
U052	36-45	Female	Other	Medium	Bachelor	4	4	4	4	3	2	2	4	4	4	4	3	4	4	2	4	3	3	5	3
U053	18-25	Male	Other Southwest	Low	Bachelor	4	4	4	4	2	3	3	4	5	4	4	4	3	5	3	3	3	4	5	2
U054	26-35	Female	Other	Low	Master	5	5	3	4	3	4	4	4	5	4	5	4	5	4	2	3	2	3	2	3
U055	26-35	Female	Other Southwest	Medium	High School	4	3	4	4	5	5	4	5	4	5	5	4	3	4	4	3	3	4	4	3
U056	46-55	Female	Guizhou	High	Master	5	5	5	5	4	5	4	4	4	5	3	4	4	4	4	5	4	4	5	3
U057	18-25	Male	Guizhou	Low	Bachelor	5	4	5	4	4	3	5	4	5	4	5	4	3	3	4	5	2	3	4	2
U058	18-25	Male	Other	Low	Bachelor	3	5	4	3	3	3	3	3	4	4	3	3	4	3	2	3	3	2	3	3
U059	36-45	Male	Eastern China	Low	Bachelor	2	3	3	4	4	2	2	2	3	3	3	3	3	3	2	2	4	3	5	1
U060	26-35	Female	Guizhou	Medium	PhD	2	2	3	3	3	3	1	3	4	4	2	5	3	4	4	4	4	4	5	2
U061	26-35	Male	Eastern China	Low	Bachelor	4	4	4	3	2	4	4	2	4	4	3	3	4	3	5	3	2	4	3	3
U062	26-35	Female	Eastern China	Low	Master	3	3	4	4	4	4	4	4	3	2	3	5	5	4	3	3	5	5	4	3
U063	26-35	Female	Other Southwest	Medium	Master	4	4	2	4	5	4	4	5	3	4	4	2	2	1	3	4	3	4	4	4
U064	26-35	Female	Guizhou	Medium	Master	5	4	4	5	4	3	4	4	3	3	3	5	4	4	3	3	3	4	4	3
U065	36-45	Female	Guizhou	Low	Master	3	4	3	3	2	3	3	3	4	4	4	3	3	2	4	3	3	4	5	4
U066	18-25	Male	Northern China	Low	Bachelor	5	5	4	5	3	2	2	3	3	4	4	5	4	4	3	3	3	4	2	4
U067	26-35	Male	Other Southwest	Medium	Bachelor	4	4	3	2	4	4	2	4	5	4	5	3	5	4	4	5	3	3	3	4
U068	26-35	Female	Guizhou	Low	Bachelor	4	3	4	4	4	4	3	3	3	3	5	3	2	3	2	4	3	3	3	4
U069	26-35	Male	Other Southwest	Low	Bachelor	4	5	5	4	3	3	2	3	5	2	3	4	3	4	3	3	3	3	5	2
U070	26-35	Female	Other	Medium	Bachelor	4	4	3	4	3	3	3	3	3	4	3	3	4	3	2	1	3	3	3	4
U071	18-25	Male	Northern China	Low	Master	3	4	3	4	4	3	3	3	4	4	5	2	3	2	3	3	3	3	4	4
U072	46-55	Female	Eastern China	High	Bachelor	4	4	5	4	3	1	2	2	4	4	5	3	3	4	4	4	4	4	5	2
U073	36-45	Male	Other	Low	High School	4	4	3	4	1	5	3	3	3	3	2	5	4	5	2	4	3	3	3	3
U074	46-55	Male	Other	Medium	Bachelor	3	1	4	2	3	3	3	4	3	4	3	3	3	3	3	4	3	3	3	3
U075	46-55	Female	Northern China	High	Master	3	3	3	2	4	3	3	2	5	5	4	4	5	4	4	5	5	4	4	4
U076	56+	Male	Eastern China	Medium	Master	3	5	5	5	4	4	5	2	4	4	3	3	3	4	4	5	4	4	2	4
U077	36-45	Male	Other	Low	Master	4	3	3	4	4	3	3	5	4	4	4	3	3	3	4	5	2	3	2	3
U078	26-35	Male	Eastern China	Medium	High School	4	5	5	4	3	3	4	4	5	3	4	4	4	4	3	2	3	2	4	3
U079	18-25	Female	Other	Medium	PhD	4	3	3	4	3	3	4	3	3	3	3	3	3	2	4	4	4	4	4	2
U080	36-45	Female	Guizhou	Low	Bachelor	3	4	3	3	4	4	4	5	4	4	3	3	3	4	3	2	3	3	3	4
U081	36-45	Female	Guizhou	Medium	Bachelor	5	4	5	5	4	5	5	4	3	3	4	4	4	5	4	2	3	3	5	3
U082	46-55	Female	Northern China	High	Bachelor	3	2	3	4	5	3	4	3	3	4	3	4	5	4	4	4	5	3	5	3
U083	18-25	Male	Eastern China	Medium	Bachelor	3	2	3	3	3	3	3	3	5	5	4	3	3	4	5	5	4	4	4	3
U084	36-45	Male	Guizhou	Medium	Bachelor	4	5	3	3	4	5	5	5	4	3	4	5	5	5	5	3	4	3	4	3
U085	18-25	Male	Eastern China	High	Bachelor	3	3	3	4	4	4	4	4	4	5	4	4	5	4	4	3	4	4	4	2
U086	36-45	Female	Other Southwest	Medium	Bachelor	3	3	3	3	4	5	3	5	5	4	4	1	1	2	3	4	2	4	5	4
U087	26-35	Female	Eastern China	Medium	Bachelor	5	4	4	3	4	4	4	5	5	4	4	4	4	5	2	3	3	4	3	3
U088	26-35	Female	Eastern China	Low	Bachelor	5	3	5	4	4	4	2	4	4	4	4	3	4	3	3	2	3	2	4	5
U089	18-25	Female	Northern China	Medium	PhD	5	4	5	4	2	2	1	2	4	3	3	4	3	4	4	4	3	4	3	4
U090	46-55	Female	Northern China	Low	Bachelor	4	4	3	3	2	3	3	3	3	4	3	4	5	4	4	3	2	2	4	4
U091	26-35	Male	Eastern China	Low	Bachelor	3	3	3	3	2	3	2	3	4	4	4	3	2	2	3	4	3	4	4	3
U092	26-35	Female	Eastern China	Low	Master	3	3	3	3	4	3	2	3	3	3	3	2	3	2	4	4	4	5	3	4
U093	18-25	Female	Eastern China	Low	Bachelor	3	4	3	3	5	3	3	3	3	3	3	4	5	4	1	2	1	2	3	3
U094	46-55	Male	Northern China	Low	High School	4	4	4	4	2	3	2	2	4	4	3	4	2	3	4	4	2	4	4	4
U095	26-35	Female	Other Southwest	Medium	Master	3	2	3	3	4	5	4	5	4	4	3	2	2	3	4	4	3	4	3	3
U096	26-35	Female	Eastern China	Low	Bachelor	3	4	2	4	3	3	4	4	4	4	5	4	3	3	3	3	3	4	3	2
U097	36-45	Female	Eastern China	Medium	Bachelor	4	3	4	3	2	4	3	4	3	3	4	3	3	3	3	4	3	4	4	3
U098	36-45	Female	Other Southwest	Medium	Master	2	3	3	4	2	2	3	3	4	4	4	3	3	4	3	3	5	4	4	3
U099	26-35	Female	Guizhou	Low	Master	4	4	4	5	4	5	3	5	4	3	4	4	4	3	4	4	4	4	4	3
U100	18-25	Female	Other Southwest	Medium	Master	4	3	4	3	4	4	4	3	4	3	3	2	3	2	4	3	4	4	3	4
U101	36-45	Female	Guizhou	Low	PhD	4	2	4	3	3	3	2	2	4	3	3	4	5	5	3	4	3	3	5	4
U102	36-45	Male	Other	Medium	High School	4	3	3	3	4	2	4	4	3	4	4	3	5	4	3	3	4	4	4	3
U103	56+	Male	Guizhou	Low	Bachelor	4	3	3	5	5	4	5	5	3	4	3	4	4	5	3	4	4	3	4	4
U104	36-45	Male	Guizhou	Low	Master	3	3	4	4	2	3	3	3	4	5	5	5	5	5	4	4	4	4	4	3
U105	18-25	Female	Northern China	High	PhD	4	3	3	4	3	3	4	3	4	4	4	4	4	4	4	4	5	4	3	2
U106	26-35	Female	Eastern China	Low	Master	4	4	4	4	3	3	3	3	4	4	3	2	3	3	3	4	4	5	4	3
U107	46-55	Female	Guizhou	Low	Bachelor	4	4	4	2	3	4	4	3	5	5	5	3	3	2	4	2	3	4	4	4
U108	26-35	Female	Other Southwest	Low	Bachelor	2	3	3	4	4	3	3	4	5	5	5	3	3	3	4	5	3	3	3	4
U109	36-45	Female	Northern China	Medium	Bachelor	4	5	5	4	4	5	5	3	4	5	5	4	4	4	5	5	4	5	4	4
U110	36-45	Female	Guizhou	High	Bachelor	4	5	4	4	3	3	3	3	4	4	4	3	4	3	4	4	4	3	4	3
U111	18-25	Female	Eastern China	Low	Bachelor	3	4	3	4	4	5	3	4	2	3	3	3	2	2	5	5	4	5	3	5
U112	26-35	Male	Guizhou	Low	Bachelor	4	3	4	3	5	3	5	5	3	3	3	4	4	4	5	4	3	3	3	2
U113	36-45	Female	Eastern China	Medium	PhD	4	3	5	5	4	3	4	4	3	3	3	4	4	5	3	2	2	3	3	4
U114	56+	Female	Guizhou	High	PhD	3	4	5	4	4	5	3	3	4	5	4	4	4	3	4	5	5	5	5	4
U115	18-25	Female	Guizhou	High	Bachelor	4	4	4	5	3	3	4	3	5	5	5	3	3	4	4	4	4	4	4	3
U116	18-25	Female	Guizhou	Low	Bachelor	3	5	5	5	5	3	5	4	4	4	4	2	3	2	2	2	2	2	3	4
U117	56+	Female	Guizhou	Low	Bachelor	5	4	4	5	5	4	5	4	3	4	4	5	4	5	3	2	2	2	4	3
U118	46-55	Male	Guizhou	Low	Bachelor	2	3	3	4	5	5	5	4	5	5	4	3	3	4	2	1	3	2	3	3
U119	46-55	Male	Eastern China	Medium	PhD	4	5	4	3	2	4	2	3	5	4	5	4	4	4	2	4	3	3	3	3
U120	18-25	Female	Guizhou	Low	Bachelor	3	3	3	3	2	4	4	2	4	3	3	5	4	5	4	4	2	5	5	2
U121	46-55	Female	Other	Medium	Bachelor	3	3	5	4	5	4	4	5	4	5	4	2	3	4	5	4	5	5	5	4
U122	56+	Female	Eastern China	Low	Bachelor	5	5	4	5	4	5	4	3	1	1	1	2	3	2	3	3	4	4	3	4
U123	26-35	Male	Other Southwest	Low	Master	2	3	4	4	2	3	3	3	3	3	3	3	4	2	4	3	4	3	3	4
U124	36-45	Male	Eastern China	Low	Bachelor	3	3	3	3	4	4	2	2	5	5	5	3	3	3	4	3	3	4	4	3
U125	46-55	Male	Guizhou	Low	Master	3	4	3	3	2	4	3	4	3	3	3	2	3	2	4	3	5	5	4	3
U126	18-25	Male	Eastern China	Medium	Bachelor	4	3	2	3	3	4	2	4	4	4	3	4	4	4	3	2	4	5	4	2
U127	46-55	Male	Eastern China	High	Bachelor	4	4	4	3	4	4	4	4	5	4	5	5	5	5	3	4	4	4	3	3
U128	56+	Female	Northern China	Low	Master	4	4	4	3	3	3	3	3	2	1	2	2	3	2	2	2	3	3	3	3
U129	18-25	Male	Eastern China	Medium	High School	3	3	2	3	4	4	3	4	4	4	4	4	4	3	4	4	5	4	5	3
U130	46-55	Male	Other	Low	PhD	4	4	4	2	4	5	4	4	5	5	5	2	2	3	3	3	4	3	3	4
U131	36-45	Female	Other	Low	Bachelor	3	3	2	2	3	3	2	3	1	1	2	4	3	4	4	5	3	5	4	4
U132	56+	Female	Northern China	Low	PhD	2	2	2	2	4	3	4	4	5	4	5	4	3	3	2	2	2	2	1	3
U133	18-25	Male	Eastern China	Medium	Bachelor	3	3	3	4	4	5	4	4	3	3	3	3	3	4	4	3	4	3	5	3
U134	26-35	Male	Guizhou	Medium	Bachelor	4	3	3	3	2	3	3	3	3	3	4	3	4	3	3	4	3	3	4	3
U135	36-45	Male	Guizhou	Medium	Master	4	5	5	4	3	4	3	2	3	5	5	4	5	4	3	4	3	4	4	3
U136	36-45	Female	Eastern China	Low	Bachelor	4	3	3	3	2	3	4	3	4	3	2	5	4	4	3	3	4	3	5	3
U137	18-25	Female	Other Southwest	Low	Bachelor	2	3	2	4	4	5	5	4	4	5	4	3	3	3	4	2	3	3	2	4
U138	46-55	Male	Northern China	High	PhD	5	4	3	4	5	4	3	3	4	3	3	3	3	4	4	3	2	4	5	3
U139	46-55	Female	Eastern China	Medium	High School	2	2	2	2	3	3	4	2	3	4	3	5	4	5	4	4	3	3	5	4
U140	26-35	Female	Northern China	Medium	Master	3	5	4	2	4	4	2	4	4	5	5	3	4	1	4	3	3	5	4	4
U141	26-35	Female	Guizhou	Medium	Bachelor	3	4	3	4	2	3	2	4	5	4	5	2	1	2	4	4	4	3	5	3
U142	56+	Male	Other Southwest	Low	Master	4	2	5	5	3	3	4	4	4	3	3	3	4	3	3	3	3	2	3	4
U143	18-25	Female	Other Southwest	Low	Bachelor	4	4	5	4	4	4	3	3	4	4	4	3	4	4	3	3	3	3	3	4
U144	36-45	Female	Other	Low	PhD	2	3	3	3	1	2	1	3	3	3	4	4	3	4	3	2	2	1	2	4
U145	26-35	Male	Other	Medium	Master	2	3	2	2	4	2	2	4	5	5	5	4	4	4	4	3	5	5	4	4
U146	26-35	Female	Eastern China	Medium	Master	5	5	5	4	4	3	4	4	4	4	5	4	4	2	4	3	3	2	3	3
U147	26-35	Male	Eastern China	Low	Master	4	5	4	5	2	3	3	3	4	3	4	4	4	3	3	3	2	3	4	2
U148	56+	Male	Other Southwest	Low	Bachelor	5	4	3	4	2	3	3	4	3	4	3	3	3	3	5	4	4	5	3	4
U149	26-35	Female	Other Southwest	Low	Master	4	4	4	4	1	1	3	2	4	4	4	2	2	1	3	4	3	4	4	4
U150	26-35	Male	Other Southwest	High	High School	4	4	4	3	4	3	4	4	3	3	2	2	2	3	3	3	3	4	5	3
U151	26-35	Male	Other Southwest	Low	Master	5	4	5	3	3	3	4	2	3	3	2	4	4	4	4	3	3	3	3	4
U152	26-35	Male	Other Southwest	Medium	Master	4	4	4	4	3	4	2	1	5	4	5	4	5	5	2	3	2	2	4	3
U153	26-35	Female	Eastern China	High	Master	4	4	3	4	4	3	5	4	5	5	4	3	3	3	3	3	3	3	5	3
U154	36-45	Female	Other Southwest	Medium	Master	3	4	3	3	4	3	3	3	4	5	4	3	3	3	4	4	4	3	4	2
U155	26-35	Male	Eastern China	Low	Bachelor	5	4	4	4	2	3	4	2	2	2	2	2	3	2	3	4	3	3	2	4
U156	36-45	Female	Guizhou	Low	High School	5	5	5	5	4	4	3	4	3	2	2	2	3	4	4	3	4	3	3	3
U157	18-25	Female	Eastern China	Low	Master	4	4	4	3	4	3	4	3	4	5	5	4	3	5	4	5	4	5	3	2
U158	26-35	Female	Northern China	Low	High School	3	1	3	1	3	2	1	3	4	3	4	3	4	3	3	3	5	3	2	3
U159	18-25	Female	Guizhou	Medium	Bachelor	5	4	4	4	4	4	3	3	5	4	4	3	4	4	2	4	4	3	3	3
U160	26-35	Female	Eastern China	Low	Bachelor	2	4	3	4	4	3	3	3	3	4	3	4	4	3	4	4	4	3	3	3
U161	26-35	Male	Eastern China	Medium	High School	4	4	4	5	3	5	4	4	4	4	4	3	4	4	4	5	4	5	3	3
U162	56+	Female	Other	Low	PhD	2	3	2	2	3	3	4	4	3	3	5	3	2	2	3	5	4	4	3	5
U163	36-45	Male	Eastern China	Medium	Bachelor	2	3	3	2	3	3	2	3	4	3	4	3	3	3	4	4	4	3	3	4
U164	46-55	Male	Other	Low	Master	4	4	4	4	3	2	2	2	4	3	3	4	4	3	2	3	4	3	4	4
U165	56+	Male	Other	Low	Master	4	4	3	5	3	4	3	4	3	3	3	2	2	2	4	4	4	4	3	5
U166	46-55	Male	Northern China	Low	Bachelor	3	3	3	3	4	5	4	4	5	4	4	3	2	3	5	5	3	5	4	2
U167	18-25	Female	Northern China	Medium	Master	4	4	4	3	3	3	3	2	2	2	2	2	3	2	4	5	5	5	5	3
U168	26-35	Female	Guizhou	Medium	Bachelor	2	3	3	3	4	4	5	4	3	4	3	4	4	5	5	5	4	5	4	5
U169	36-45	Male	Northern China	Medium	Bachelor	3	4	4	3	5	3	4	4	4	5	4	3	3	2	4	3	3	3	4	3
U170	36-45	Male	Other	Low	Master	5	3	4	3	5	3	4	4	4	4	4	4	3	4	3	1	2	2	2	4
U171	18-25	Female	Guizhou	High	Master	4	4	5	4	2	3	3	2	4	4	4	4	4	5	4	5	3	4	5	2
U172	36-45	Female	Other	High	Bachelor	5	5	5	5	3	4	3	4	4	5	3	2	3	3	4	5	5	5	4	3
U173	26-35	Female	Northern China	Medium	Master	4	3	4	4	3	5	5	4	3	4	4	5	5	5	2	3	2	2	4	3
U174	18-25	Female	Eastern China	Low	Bachelor	3	4	4	5	5	5	5	5	4	3	5	5	4	4	2	2	2	2	3	4
U175	26-35	Female	Guizhou	Low	Master	5	4	5	4	3	5	4	4	5	5	4	5	4	4	3	4	4	4	5	5
U176	26-35	Female	Eastern China	Low	Bachelor	5	4	5	4	3	3	3	4	2	3	2	4	4	3	2	4	4	3	3	3
U177	26-35	Male	Northern China	Low	PhD	4	3	2	3	4	4	4	3	5	5	5	4	4	4	2	4	3	3	3	4
U178	18-25	Female	Other Southwest	Medium	Master	4	3	3	3	3	2	1	4	4	4	4	2	3	3	4	4	4	4	2	3
U179	36-45	Female	Northern China	Medium	Bachelor	5	5	3	5	4	2	3	3	4	4	5	3	4	4	3	3	3	2	3	4
U180	46-55	Female	Other Southwest	Low	High School	3	4	4	4	4	2	4	3	2	3	3	4	3	3	3	3	4	3	4	3
U181	36-45	Male	Eastern China	Low	PhD	3	4	4	4	4	4	3	3	3	4	3	3	2	3	3	4	4	4	4	5
U182	18-25	Male	Eastern China	Medium	Bachelor	5	4	5	4	5	3	4	5	4	5	4	3	4	3	4	3	3	2	4	3
U183	18-25	Male	Other Southwest	Low	Bachelor	4	4	4	4	4	5	4	5	2	3	3	4	5	4	3	4	4	5	4	4
U184	18-25	Male	Eastern China	Medium	Bachelor	3	4	4	5	5	4	4	4	4	4	4	4	4	4	3	2	4	3	4	1
U185	36-45	Female	Northern China	High	Master	4	4	4	4	3	2	2	1	4	5	4	5	4	5	3	2	4	2	3	5
U186	26-35	Male	Northern China	High	Master	4	4	4	3	4	4	3	5	4	3	3	3	3	4	3	4	3	3	5	3
U187	46-55	Female	Eastern China	High	Master	3	3	3	3	3	3	4	3	3	5	4	4	4	3	4	3	3	3	5	2
U188	26-35	Male	Eastern China	Medium	Master	2	3	4	2	4	4	5	4	3	4	3	3	3	4	4	3	3	5	2	3
U189	56+	Female	Guizhou	Low	Master	5	5	5	4	3	4	3	3	3	5	4	2	3	4	4	2	3	2	4	2
U190	26-35	Male	Guizhou	Medium	Bachelor	2	3	4	3	3	3	2	4	3	2	4	4	5	5	4	4	4	4	3	3
U191	36-45	Male	Northern China	Medium	Master	3	4	4	4	4	3	2	2	5	4	5	2	3	3	2	4	4	3	5	5
U192	46-55	Male	Eastern China	High	Bachelor	5	5	5	5	3	3	2	4	5	5	5	4	4	4	4	5	4	5	3	4
U193	36-45	Male	Other	Medium	Master	3	3	4	1	4	3	4	5	3	4	3	4	5	5	4	3	4	3	3	4
U194	26-35	Female	Northern China	Low	Bachelor	4	3	4	4	3	2	3	4	2	3	4	3	4	3	3	3	4	3	3	4
U195	18-25	Female	Other	Medium	Bachelor	4	4	4	4	4	5	5	3	3	3	3	5	4	5	3	3	1	2	4	3
U196	26-35	Female	Northern China	Low	Master	5	4	5	4	4	4	4	4	5	5	5	3	4	3	3	4	2	2	3	4
U197	36-45	Male	Northern China	Medium	Bachelor	4	4	4	4	5	5	5	4	3	3	3	2	2	2	4	3	2	4	3	5
U198	46-55	Male	Eastern China	Medium	Bachelor	3	4	3	3	2	3	3	3	3	4	3	4	4	4	5	5	4	5	5	3
U199	26-35	Female	Guizhou	Low	Master	4	4	4	4	1	3	2	1	4	4	4	2	2	3	3	4	4	2	4	3
U200	46-55	Male	Other	High	High School	2	4	3	4	2	3	3	4	3	4	3	5	3	4	3	3	4	4	5	2
U201	36-45	Male	Guizhou	Low	Master	3	3	4	3	3	4	3	3	5	4	4	4	4	4	3	4	3	4	5	4
U202	56+	Male	Guizhou	Low	Bachelor	3	4	5	2	3	2	4	2	3	3	3	4	4	4	3	4	5	4	5	1
U203	18-25	Male	Other	Medium	Bachelor	3	3	4	4	4	5	5	5	3	4	4	4	3	4	3	3	3	3	4	3
U204	26-35	Female	Other	Low	Master	2	4	3	3	4	4	4	4	3	4	3	5	4	4	4	4	5	4	5	3
U205	18-25	Female	Other Southwest	Low	Master	4	3	5	4	2	3	3	3	5	5	5	2	1	2	4	4	4	3	2	3
U206	56+	Female	Other Southwest	Low	High School	3	3	3	5	3	4	4	4	2	3	3	2	2	3	3	4	4	3	4	2
U207	36-45	Male	Eastern China	Low	Master	4	3	4	3	5	5	5	5	2	3	3	4	5	3	3	3	4	4	4	4
U208	26-35	Male	Eastern China	Low	Bachelor	3	3	3	4	4	3	4	4	3	3	3	3	2	3	3	3	3	4	4	4
U209	18-25	Male	Northern China	Low	Bachelor	3	3	3	3	4	3	3	4	4	4	5	3	3	2	3	3	3	3	3	4
U210	26-35	Female	Guizhou	Medium	Bachelor	3	4	3	2	3	4	3	3	4	4	2	2	3	3	2	4	4	3	5	4
U211	26-35	Male	Guizhou	Medium	Bachelor	3	4	3	2	3	3	3	3	5	5	5	4	4	4	2	3	4	3	3	4
U212	26-35	Male	Northern China	Medium	Bachelor	3	4	4	4	4	3	3	4	5	5	4	2	4	3	3	5	4	5	5	4
U213	36-45	Female	Guizhou	Low	High School	3	3	3	3	3	3	3	4	4	3	3	4	4	4	3	3	2	3	5	3
U214	46-55	Male	Other	Low	Master	3	4	2	3	2	2	3	2	3	3	4	3	3	2	3	4	4	4	4	3
U215	26-35	Female	Northern China	Medium	Master	2	3	4	2	2	3	3	4	3	4	4	3	3	3	3	4	4	3	4	4
U216	26-35	Female	Northern China	High	High School	4	5	5	5	4	3	4	3	3	3	5	4	3	4	4	4	4	5	5	3
U217	46-55	Male	Northern China	Medium	Bachelor	3	3	3	2	3	3	3	3	3	4	4	4	4	4	5	3	4	3	3	2
U218	36-45	Female	Northern China	Low	Master	3	3	3	3	4	2	3	4	4	5	3	5	3	4	2	1	3	3	3	5
U219	18-25	Male	Northern China	Low	Master	3	3	3	2	3	2	3	3	2	3	3	3	4	3	3	4	4	4	4	3
U220	18-25	Male	Northern China	Low	Master	4	2	4	4	3	3	2	3	4	3	3	3	4	3	3	4	4	2	3	2
U221	18-25	Male	Guizhou	Medium	Bachelor	3	3	4	4	3	4	3	4	5	3	4	3	3	2	4	3	4	4	5	3
U222	18-25	Male	Northern China	High	Master	5	4	4	4	3	5	4	4	4	4	4	5	4	4	3	4	2	3	3	2
U223	18-25	Male	Other	Medium	Master	4	5	4	4	5	4	3	3	3	4	4	5	5	5	4	4	5	4	3	3
U224	18-25	Female	Eastern China	Medium	Bachelor	3	4	2	3	4	3	4	4	4	4	5	4	4	4	3	4	4	4	4	3
U225	26-35	Male	Eastern China	Low	Bachelor	2	3	2	3	2	2	1	3	4	3	3	4	5	5	4	3	2	3	4	3
U226	26-35	Male	Northern China	Low	Master	4	4	3	4	5	2	3	3	4	3	4	1	3	1	4	3	3	3	2	4
U227	56+	Male	Northern China	Medium	PhD	3	2	4	2	2	2	2	2	2	3	4	4	4	3	3	3	4	3	5	3
U228	36-45	Male	Other Southwest	Low	Bachelor	3	3	3	3	2	3	3	2	2	1	1	3	3	3	4	5	3	4	4	3
U229	36-45	Male	Other	Low	Bachelor	3	2	3	4	4	4	3	4	4	4	4	4	4	5	4	3	4	4	3	4
U230	36-45	Female	Northern China	High	Master	4	2	4	3	4	3	4	4	5	4	5	4	4	3	3	3	5	3	4	3
U231	36-45	Male	Other Southwest	Medium	Master	3	3	3	3	4	5	4	5	5	2	5	4	3	3	3	5	4	2	3	3
U232	36-45	Female	Northern China	Low	Bachelor	3	2	3	2	3	3	4	3	3	2	3	4	3	3	3	5	5	3	5	4
U233	46-55	Male	Other Southwest	Medium	Master	4	3	3	3	4	4	4	3	4	3	4	5	3	5	4	3	5	3	4	2
U234	26-35	Male	Guizhou	High	Bachelor	3	4	3	4	3	2	3	4	4	5	5	4	4	4	3	3	4	5	5	3
U235	18-25	Male	Eastern China	Low	Master	3	3	2	4	2	3	2	2	2	3	3	3	3	3	3	3	3	3	4	4
U236	26-35	Male	Eastern China	Low	Bachelor	3	1	3	2	3	3	2	3	4	3	3	3	2	2	4	4	3	4	2	3
U237	18-25	Female	Northern China	Low	Master	4	4	3	4	3	3	3	3	4	5	4	2	2	2	4	3	2	4	4	4
U238	36-45	Female	Guizhou	Medium	Master	4	4	4	5	5	3	3	3	5	4	4	5	5	5	3	4	4	3	5	4
U239	36-45	Female	Eastern China	Low	Bachelor	3	2	2	2	2	2	2	3	3	4	2	4	5	5	2	5	3	3	4	4
U240	46-55	Female	Eastern China	Medium	Bachelor	5	5	5	5	3	3	4	3	2	3	3	4	4	4	5	5	5	5	3	4
U241	46-55	Male	Other Southwest	Low	Master	4	3	5	4	3	3	2	3	5	5	5	3	3	3	4	5	5	5	2	3
U242	18-25	Male	Other	Low	High School	5	5	5	5	1	2	2	2	4	4	4	4	4	4	2	3	1	2	4	3
U243	18-25	Female	Other	Low	Bachelor	2	3	4	3	2	3	2	3	3	4	5	5	5	5	3	3	4	3	4	4
U244	36-45	Male	Other Southwest	High	Master	3	4	2	2	5	5	5	5	3	3	3	3	4	4	4	5	5	4	5	4
U245	26-35	Male	Other Southwest	High	Bachelor	3	4	4	4	4	4	3	4	4	4	4	4	5	5	4	3	5	4	4	3
U246	36-45	Female	Eastern China	Medium	High School	4	5	4	4	3	3	4	3	3	3	4	3	3	4	2	4	3	3	3	3
U247	56+	Male	Eastern China	Low	Bachelor	4	3	4	4	3	3	4	3	4	4	3	4	3	3	4	4	3	4	3	3
U248	26-35	Male	Other	Low	Bachelor	2	1	2	3	3	4	4	4	5	4	5	3	3	2	4	4	5	3	4	4
U249	18-25	Female	Northern China	Low	Master	3	4	4	4	2	3	4	4	4	4	3	3	4	4	3	2	3	3	4	2
U250	36-45	Male	Guizhou	Low	Bachelor	4	4	3	4	4	4	5	5	3	3	3	3	2	2	3	4	2	2	4	2
U251	36-45	Female	Other	Low	Bachelor	5	5	5	4	4	3	4	3	5	5	5	3	3	4	4	4	2	4	3	4
U252	46-55	Male	Guizhou	Low	High School	2	3	3	3	5	5	5	4	5	5	5	2	3	4	5	5	5	5	5	5
U253	46-55	Male	Northern China	Medium	Bachelor	4	5	3	3	4	3	3	3	3	4	4	3	4	3	3	4	3	3	3	3
U254	26-35	Male	Northern China	Low	High School	3	3	3	3	4	4	4	4	4	4	4	3	4	3	3	2	3	3	4	2
U255	56+	Male	Other Southwest	Low	Bachelor	4	4	4	4	3	3	2	3	2	4	3	2	2	2	3	3	3	3	3	4
U256	26-35	Female	Other Southwest	High	Bachelor	3	5	5	4	3	5	4	5	4	4	4	4	4	3	4	4	4	4	4	1
U257	26-35	Female	Other Southwest	Medium	Bachelor	3	4	4	4	3	5	4	4	5	4	4	4	4	2	2	3	3	3	3	2
U258	46-55	Male	Northern China	Low	Bachelor	2	3	2	1	3	3	4	3	4	4	5	2	3	3	3	2	2	3	5	3
U259	56+	Female	Other	High	Master	3	3	4	4	4	3	4	3	3	3	4	3	3	4	3	4	3	3	5	3
U260	46-55	Female	Eastern China	Medium	Master	3	3	2	3	4	5	3	3	4	5	4	3	3	2	3	3	2	3	4	3
U261	36-45	Male	Eastern China	Low	High School	5	5	4	4	4	3	5	5	3	4	4	4	3	4	3	3	3	4	3	3
U262	46-55	Female	Northern China	Low	Master	4	5	5	4	3	1	2	3	3	3	3	3	4	4	3	3	4	4	3	4
U263	26-35	Male	Other Southwest	Low	Master	4	2	3	3	3	4	4	3	2	3	3	3	3	3	4	4	4	4	3	3
U264	36-45	Female	Other Southwest	Low	Bachelor	4	3	3	3	4	4	4	4	3	2	3	4	3	4	2	4	2	3	4	3
U265	56+	Male	Eastern China	Low	Bachelor	3	2	3	3	2	3	3	3	5	4	4	3	4	4	5	5	4	5	4	4
U266	46-55	Female	Other	Medium	Bachelor	4	2	4	3	3	2	2	3	3	4	4	4	4	4	4	3	3	3	2	2
U267	18-25	Female	Northern China	Low	Bachelor	3	2	2	2	5	5	4	5	4	5	5	3	4	4	5	4	3	4	4	3
U268	26-35	Male	Eastern China	High	PhD	5	4	2	3	5	5	4	4	3	4	4	4	5	5	4	4	5	4	5	3
U269	46-55	Male	Other	Low	Master	3	4	3	3	4	3	3	3	3	4	4	3	3	5	4	4	3	3	4	5
U270	26-35	Female	Guizhou	Medium	Bachelor	5	5	5	5	5	5	4	5	4	4	5	3	3	3	4	5	5	5	4	3
U271	26-35	Male	Other	Low	PhD	5	4	4	5	3	3	3	3	3	3	3	4	5	4	3	3	3	3	3	4
U272	26-35	Female	Guizhou	High	Bachelor	3	4	4	5	4	4	4	4	4	4	3	5	4	5	5	5	5	5	4	2
U273	56+	Male	Eastern China	Low	PhD	3	3	2	4	2	3	3	4	4	4	4	3	3	2	3	4	3	4	4	3
U274	18-25	Male	Guizhou	Medium	Bachelor	4	5	5	4	4	5	4	5	4	3	4	4	4	5	4	3	4	3	4	3
U275	26-35	Female	Other	Low	Bachelor	3	3	3	3	3	3	3	1	2	2	3	3	4	4	3	4	5	4	3	4
U276	18-25	Female	Northern China	Medium	Master	3	4	3	3	4	4	4	3	3	3	3	3	5	5	4	4	5	4	3	4
U277	36-45	Male	Other	High	Master	3	2	2	3	3	3	3	3	3	3	3	3	3	5	4	4	5	4	5	4
U278	18-25	Female	Northern China	Medium	Master	5	5	5	5	5	4	4	3	4	2	4	3	2	3	3	2	3	3	4	4
U279	26-35	Female	Eastern China	Low	Bachelor	2	3	3	3	3	3	3	4	4	5	4	5	5	5	4	4	4	3	4	5
U280	18-25	Male	Eastern China	Medium	Master	3	2	4	2	3	3	2	3	3	4	3	4	4	4	3	3	3	2	5	3
U281	26-35	Female	Eastern China	Low	Master	4	4	3	4	4	5	4	4	4	4	4	2	2	2	2	3	3	4	4	3
U282	56+	Female	Other Southwest	Low	High School	4	3	3	3	4	5	4	4	3	4	3	5	3	3	4	2	3	3	2	4
U283	56+	Male	Eastern China	Low	Master	3	3	1	2	1	2	2	3	5	4	4	3	3	4	4	4	5	4	5	5
U284	18-25	Female	Northern China	High	Master	5	5	4	5	5	4	4	4	5	4	4	3	3	4	3	3	2	4	4	2
U285	36-45	Male	Guizhou	Medium	PhD	4	4	4	3	2	3	4	3	5	3	4	3	3	2	3	3	3	4	3	3
U286	36-45	Male	Other Southwest	Medium	Master	3	4	3	3	3	4	2	3	5	5	5	4	5	4	2	3	2	3	3	3
U287	26-35	Male	Other	High	Master	4	4	4	4	4	5	5	5	1	2	2	5	4	5	5	4	4	4	3	3
U288	36-45	Male	Northern China	Medium	Bachelor	4	4	5	4	4	5	3	4	4	4	4	5	5	4	2	3	2	3	3	3
U289	36-45	Female	Eastern China	Medium	Bachelor	4	4	3	4	3	3	4	3	2	3	3	4	5	5	4	3	4	4	4	3
U290	18-25	Female	Guizhou	Low	Bachelor	3	2	3	4	4	3	3	2	3	3	4	4	4	4	3	4	4	4	4	4
U291	26-35	Male	Other Southwest	Medium	Master	4	4	5	4	2	3	4	2	3	3	3	3	4	3	4	3	4	4	5	1
U292	36-45	Male	Other Southwest	Low	Master	3	4	2	3	3	3	4	2	5	5	5	4	4	5	3	4	5	4	2	4
U293	26-35	Female	Eastern China	High	Master	4	4	2	3	4	3	5	3	5	4	5	4	4	5	3	4	3	4	4	3
U294	26-35	Male	Eastern China	Medium	Master	4	4	4	4	3	3	2	4	2	3	4	3	3	3	3	3	2	3	4	4
U295	26-35	Male	Guizhou	Low	Bachelor	4	5	4	4	3	4	3	4	2	4	2	2	4	3	2	3	3	2	3	3
U296	26-35	Female	Eastern China	Medium	High School	5	5	5	3	4	4	4	4	4	3	4	2	3	2	5	3	3	3	4	5
U297	26-35	Female	Eastern China	High	Master	5	5	4	4	3	4	4	5	2	2	4	4	4	3	4	3	4	4	5	4
U298	46-55	Female	Guizhou	Low	Bachelor	3	2	3	2	1	3	2	1	4	5	5	2	3	3	5	5	4	5	4	4
U299	26-35	Female	Eastern China	Low	Bachelor	2	3	3	3	5	4	5	3	3	4	4	2	2	2	2	3	4	3	3	3
U300	26-35	Male	Guizhou	Low	Bachelor	3	3	2	3	3	4	2	2	2	2	3	5	4	4	5	4	5	5	4	4
U301	56+	Female	Other Southwest	High	Master	4	4	5	5	4	4	4	2	4	3	5	4	4	4	3	4	5	5	5	2
U302	36-45	Male	Northern China	High	Master	5	3	5	5	5	5	5	5	3	5	5	4	3	3	4	4	5	4	4	3
U303	18-25	Female	Other Southwest	High	PhD	5	4	4	3	4	3	5	4	4	4	4	5	3	4	4	3	4	3	3	3
U304	26-35	Female	Other	Medium	Master	4	3	5	4	3	3	4	3	2	3	3	3	3	2	4	4	3	4	4	4
U305	26-35	Male	Guizhou	Medium	Bachelor	2	3	3	3	5	4	4	3	5	4	5	3	3	3	4	4	5	4	5	3
U306	18-25	Female	Eastern China	Medium	Bachelor	3	4	4	3	4	4	4	4	4	4	3	3	3	4	4	5	5	5	3	4
U307	56+	Female	Other	Low	Bachelor	4	4	3	3	4	3	4	4	2	3	3	2	3	3	4	3	3	3	4	3
U308	26-35	Male	Guizhou	Low	High School	3	3	4	3	3	4	4	5	4	4	4	5	3	4	4	3	3	3	5	3
U309	18-25	Male	Other	Low	Bachelor	4	4	3	1	3	3	1	3	5	5	5	4	4	4	3	3	4	4	3	2
U310	46-55	Male	Eastern China	Low	Bachelor	5	5	5	4	4	4	2	4	4	4	3	3	3	3	3	2	3	5	3	4
U311	36-45	Male	Eastern China	High	Master	4	4	4	3	4	4	5	4	4	4	5	5	4	4	3	3	3	3	5	3
U312	26-35	Male	Guizhou	Medium	Bachelor	4	4	3	4	4	5	5	5	3	3	4	3	4	3	4	3	3	4	5	4
U313	46-55	Female	Northern China	Low	Master	3	3	3	4	3	3	3	3	3	2	4	3	4	3	3	2	3	2	3	4
U314	46-55	Male	Other	Low	PhD	4	3	4	4	1	2	1	2	5	5	5	4	4	3	4	4	5	4	4	5
U315	18-25	Male	Eastern China	Medium	High School	5	4	5	5	3	4	4	4	5	5	5	2	3	3	2	3	2	3	4	3
U316	18-25	Male	Eastern China	Low	Master	3	3	4	3	2	2	2	2	3	3	4	2	3	1	3	3	3	4	5	5
U317	26-35	Male	Guizhou	Medium	Master	3	5	4	4	2	4	2	4	5	5	5	5	5	4	3	4	4	4	4	2
U318	26-35	Male	Northern China	Low	Master	2	1	2	2	2	4	4	2	5	5	4	3	4	4	2	3	3	2	5	4
U319	46-55	Female	Northern China	High	High School	5	5	4	5	4	3	3	3	5	5	5	3	3	3	5	5	4	4	5	3
U320	56+	Female	Northern China	High	Bachelor	4	3	4	4	4	3	4	4	3	3	2	4	3	3	5	4	4	5	4	4

## Sheet: User_Survey_Reliability
Subscale	N_Items	N	Cronbach_Alpha	Mean_Inter_Item_r	Interpretation
Symbolic Preference	4	320	0.791	0.486	Acceptable
Narrative Appreciation	4	320	0.775	0.463	Acceptable
Contextual Adaptation	3	320	0.808	0.584	Good
Craft Value Recognition	3	320	0.823	0.607	Good
Overall Semantic Coherence	4	320	0.745	0.422	Acceptable

## Sheet: TOPSIS_Calculation
Step	Item	Symbolic Clarity	Contextual Fitness	Craft & Maintainability	Identification	Narrative Capacity
1. Decision Matrix (raw scores)	Brooch A	4.3	3.9	4.1	4.1	4.4
	Brooch B	3.6	4.2	4	3.9	3.5
2. Norm factor √(Σx²_ij)		5.60803	5.73149	5.728	5.65862	5.62228
3. Normalized (r_ij = x_ij/norm)	Brooch A	0.766758	0.680451	0.715782	0.724558	0.782601
	Brooch B	0.641937	0.732793	0.698324	0.689214	0.622524
4. AHP Weights (w_j)		0.288	0.229	0.188	0.158	0.137
5. Weighted norm (v_ij = w_j × r_ij)	Brooch A	0.220826	0.155823	0.134567	0.11448	0.107216
	Brooch B	0.184878	0.16781	0.131285	0.108896	0.085286
6. Positive Ideal A+ (max per col)		0.220826	0.16781	0.134567	0.11448	0.107216
Negative Ideal A- (min per col)		0.184878	0.155823	0.131285	0.108896	0.085286
Alternative	D+ (to positive ideal)	D- (to negative ideal)	Ci = D-/(D++D-)	Rank	Paper_Ci
Brooch A	0.011986	0.042605	0.7804	1	0.777
Brooch B	0.042605	0.011986	0.2196	2	0.223

## Sheet: MonteCarlo_Results
Perturbation	N_Iterations	BroochA_Mean_Ci	BroochA_Median_Ci	BroochA_SD	BroochA_95CI_Lo	BroochA_95CI_Hi	BroochB_Mean_Ci	BroochB_95CI_Lo	BroochB_95CI_Hi	BroochA_Rank1_%	Rank_Reversals
5%	10000	0.7806	0.7807	0.0107	0.7592	0.801	0.2194	0.199	0.2408	100	0
10%	10000	0.7804	0.7809	0.0214	0.7369	0.8207	0.2196	0.1793	0.2631	100	0
15%	10000	0.7799	0.781	0.0327	0.713	0.8416	0.2201	0.1584	0.287	100	0
25%	10000	0.7807	0.7826	0.0551	0.6667	0.8837	0.2193	0.1163	0.3333	100	1
Iteration	BroochA_Ci	BroochB_Ci	A_Rank1
1	0.7676	0.2324	1
2	0.787	0.213	1
3	0.773	0.227	1
4	0.7956	0.2044	1
5	0.7776	0.2224	1
6	0.7713	0.2287	1
7	0.7752	0.2248	1
8	0.8132	0.1868	1
9	0.7832	0.2168	1
10	0.8183	0.1817	1
11	0.797	0.203	1
12	0.7658	0.2342	1
13	0.7793	0.2207	1
14	0.7774	0.2226	1
15	0.7614	0.2386	1
16	0.7949	0.2051	1
17	0.7723	0.2277	1
18	0.8235	0.1765	1
19	0.7855	0.2145	1
20	0.7486	0.2514	1
21	0.7749	0.2251	1
22	0.7671	0.2329	1
23	0.7803	0.2197	1
24	0.7604	0.2396	1
25	0.7765	0.2235	1
26	0.7784	0.2216	1
27	0.746	0.254	1
28	0.802	0.198	1
29	0.7808	0.2192	1
30	0.7763	0.2237	1
31	0.7888	0.2112	1
32	0.7608	0.2392	1
33	0.7864	0.2136	1
34	0.7271	0.2729	1
35	0.7669	0.2331	1
36	0.7876	0.2124	1
37	0.784	0.216	1
38	0.7648	0.2352	1
39	0.7785	0.2215	1
40	0.7762	0.2238	1
41	0.7328	0.2672	1
42	0.7418	0.2582	1
43	0.7812	0.2188	1
44	0.765	0.235	1
45	0.7676	0.2324	1
46	0.8242	0.1758	1
47	0.7668	0.2332	1
48	0.7667	0.2333	1
49	0.7421	0.2579	1
50	0.7878	0.2122	1
51	0.7715	0.2285	1
52	0.778	0.222	1
53	0.7611	0.2389	1
54	0.8089	0.1911	1
55	0.7772	0.2228	1
56	0.7795	0.2205	1
57	0.7619	0.2381	1
58	0.7961	0.2039	1
59	0.7865	0.2135	1
60	0.8069	0.1931	1
61	0.7815	0.2185	1
62	0.7549	0.2451	1
63	0.7477	0.2523	1
64	0.7549	0.2451	1
65	0.7812	0.2188	1
66	0.811	0.189	1
67	0.7679	0.2321	1
68	0.7699	0.2301	1
69	0.812	0.188	1
70	0.805	0.195	1
71	0.7706	0.2294	1
72	0.7282	0.2718	1
73	0.7427	0.2573	1
74	0.819	0.181	1
75	0.8405	0.1595	1
76	0.7866	0.2134	1
77	0.7711	0.2289	1
78	0.735	0.265	1
79	0.735	0.265	1
80	0.7787	0.2213	1
81	0.774	0.226	1
82	0.7696	0.2304	1
83	0.8255	0.1745	1
84	0.757	0.243	1
85	0.7782	0.2218	1
86	0.7861	0.2139	1
87	0.7694	0.2306	1
88	0.8205	0.1795	1
89	0.8048	0.1952	1
90	0.767	0.233	1
91	0.7915	0.2085	1
92	0.7847	0.2153	1
93	0.7459	0.2541	1
94	0.7878	0.2122	1
95	0.8153	0.1847	1
96	0.7857	0.2143	1
97	0.7819	0.2181	1
98	0.7635	0.2365	1
99	0.7498	0.2502	1
100	0.8045	0.1955	1
101	0.8098	0.1902	1
102	0.7483	0.2517	1
103	0.7665	0.2335	1
104	0.8126	0.1874	1
105	0.7979	0.2021	1
106	0.7821	0.2179	1
107	0.8005	0.1995	1
108	0.8073	0.1927	1
109	0.819	0.181	1
110	0.792	0.208	1
111	0.7493	0.2507	1
112	0.7576	0.2424	1
113	0.7777	0.2223	1
114	0.7733	0.2267	1
115	0.7447	0.2553	1
116	0.8127	0.1873	1
117	0.7806	0.2194	1
118	0.7469	0.2531	1
119	0.7999	0.2001	1
120	0.7585	0.2415	1
121	0.7723	0.2277	1
122	0.7864	0.2136	1
123	0.7784	0.2216	1
124	0.787	0.213	1
125	0.7987	0.2013	1
126	0.7827	0.2173	1
127	0.7692	0.2308	1
128	0.7474	0.2526	1
129	0.7496	0.2504	1
130	0.795	0.205	1
131	0.7991	0.2009	1
132	0.7737	0.2263	1
133	0.7695	0.2305	1
134	0.7603	0.2397	1
135	0.8171	0.1829	1
136	0.7705	0.2295	1
137	0.7896	0.2104	1
138	0.7576	0.2424	1
139	0.8128	0.1872	1
140	0.7892	0.2108	1
141	0.8216	0.1784	1
142	0.7787	0.2213	1
143	0.8142	0.1858	1
144	0.7419	0.2581	1
145	0.7732	0.2268	1
146	0.7672	0.2328	1
147	0.7503	0.2497	1
148	0.8003	0.1997	1
149	0.7504	0.2496	1
150	0.7728	0.2272	1
151	0.8357	0.1643	1
152	0.7666	0.2334	1
153	0.774	0.226	1
154	0.7757	0.2243	1
155	0.7802	0.2198	1
156	0.771	0.229	1
157	0.7822	0.2178	1
158	0.7971	0.2029	1
159	0.791	0.209	1
160	0.7466	0.2534	1
161	0.7415	0.2585	1
162	0.791	0.209	1
163	0.8017	0.1983	1
164	0.7637	0.2363	1
165	0.7721	0.2279	1
166	0.8052	0.1948	1
167	0.7701	0.2299	1
168	0.7428	0.2572	1
169	0.7684	0.2316	1
170	0.7842	0.2158	1
171	0.7872	0.2128	1
172	0.7901	0.2099	1
173	0.7625	0.2375	1
174	0.7895	0.2105	1
175	0.7708	0.2292	1
176	0.75	0.25	1
177	0.7636	0.2364	1
178	0.7594	0.2406	1
179	0.7795	0.2205	1
180	0.7878	0.2122	1
181	0.7527	0.2473	1
182	0.8004	0.1996	1
183	0.7715	0.2285	1
184	0.7752	0.2248	1
185	0.8115	0.1885	1
186	0.7586	0.2414	1
187	0.7708	0.2292	1
188	0.8089	0.1911	1
189	0.8246	0.1754	1
190	0.8255	0.1745	1
191	0.7664	0.2336	1
192	0.748	0.252	1
193	0.7668	0.2332	1
194	0.7843	0.2157	1
195	0.826	0.174	1
196	0.7669	0.2331	1
197	0.7893	0.2107	1
198	0.8219	0.1781	1
199	0.7594	0.2406	1
200	0.7654	0.2346	1

## Sheet: Variable_Codebook
Variable	Type	Description	Values	Scale	Source
Expert_ID	ID	Expert panel member identifier	E01-E25	Nominal	Expert panel (n=25)
Respondent_ID	ID	Survey respondent identifier	U001-U320	Nominal	User survey (n=320)
Age_Group	Demographic	Respondent age bracket	18-25 / 26-35 / 36-45 / 46-55 / 56+	Ordinal	User survey
Gender	Demographic	Respondent gender	Male / Female	Nominal	User survey
Region	Demographic	Geographic region of residence	Guizhou / Other Southwest / Eastern China / Northern China / Other	Nominal	User survey
Familiarity	Demographic	Self-reported familiarity with Miao cultural heritage	High / Medium / Low	Ordinal	User survey
Education	Demographic	Highest education level	High School / Bachelor / Master / PhD	Ordinal	User survey
Symbolic_Q1 to Q4	Subscale item	Symbolic Preference subscale (4 items): degree to which respondent values clear symbolic representation	1-5 (Strongly Disagree to Strongly Agree)	Likert	User survey
Narrative_Q1 to Q4	Subscale item	Narrative Appreciation subscale (4 items): degree to which respondent values mythic narrative depth	1-5	Likert	User survey
Context_Q1 to Q3	Subscale item	Contextual Adaptation subscale (3 items): perceived fitness for contemporary everyday use	1-5	Likert	User survey
Craft_Q1 to Q3	Subscale item	Craft Value Recognition subscale (3 items): recognition of craft ethics, repairability, maker responsibility	1-5	Likert	User survey
Coherence_Q1 to Q4	Subscale item	Overall Semantic Coherence subscale (4 items): perceived cultural-semantic integrity of design	1-5	Likert	User survey
Preference_BroochA	Outcome	Overall preference for Brooch A (Butterfly Mother + filigree layering)	1-5	Likert	User survey
Preference_BroochB	Outcome	Overall preference for Brooch B (abstract dragon-crest + smooth finish)	1-5	Likert	User survey
AHP pairwise value	Expert judgement	Saaty 1-9 reciprocal scale pairwise comparison of criterion importance	1/9 to 9	Ratio	Expert panel
Criterion score	Expert evaluation	Expert benefit-scale rating of alternative on each criterion	1.0-5.0 (0.5 increments)	Interval	Expert panel

## Sheet: Demographic_Summary
Category	Value	n	Percent
Age_Group	18-25	74	23.1
Age_Group	26-35	96	30
Age_Group	36-45	71	22.2
Age_Group	46-55	50	15.6
Age_Group	56+	29	9.1
Gender	Male	156	48.8
Gender	Female	164	51.2
Region	Guizhou	66	20.6
Region	Other Southwest	49	15.3
Region	Eastern China	90	28.1
Region	Northern China	63	19.7
Region	Other	52	16.2
Familiarity	High	50	15.6
Familiarity	Medium	107	33.4
Familiarity	Low	163	50.9
Education	High School	26	8.1
Education	Bachelor	158	49.4
Education	Master	109	34.1
Education	PhD	27	8.4
Total		320	100

## Sheet: Subgroup_Analysis_S1
Comparison	Variable	Group1_n	Group1_Mean	Group1_SD	Group2_n	Group2_Mean	Group2_SD	t	p	Cohen's_d	Effect_Size
High vs Low Familiarity	Symbolic_Mean	50	3.825	0.655	163	3.42	0.719	3.551	0.0005	0.588	Medium
High vs Low Familiarity	Narrative_Mean	50	3.69	0.667	163	3.261	0.749	3.635	0.0003	0.605	Medium
High vs Low Familiarity	Context_Mean	50	3.833	0.742	163	3.622	0.831	1.614	0.108	0.269	Small
High vs Low Familiarity	Craft_Mean	50	3.82	0.614	163	3.301	0.816	4.152	0	0.719	Medium
High vs Low Familiarity	Coherence_Mean	50	3.815	0.608	163	3.374	0.67	4.157	0	0.689	Medium
High vs Low Familiarity	Preference_BroochA	50	4.36	0.749	163	3.607	0.878	5.478	0	0.922	Large
High vs Low Familiarity	Preference_BroochB	50	3.02	0.845	163	3.46	0.848	-3.213	0.0015	-0.52	Medium
Guizhou vs Other Regions	Symbolic_Mean	66	3.701	0.673	254	3.517	0.719	1.877	0.0614	0.264	Small
Guizhou vs Other Regions	Narrative_Mean	66	3.504	0.76	254	3.38	0.734	1.212	0.2264	0.166	Small
Guizhou vs Other Regions	Context_Mean	66	3.843	0.682	254	3.68	0.785	1.548	0.1227	0.222	Small
Guizhou vs Other Regions	Craft_Mean	66	3.601	0.854	254	3.416	0.781	1.681	0.0937	0.226	Small
Guizhou vs Other Regions	Coherence_Mean	66	3.61	0.675	254	3.468	0.661	1.552	0.1216	0.213	Small
Guizhou vs Other Regions	Preference_BroochA	66	4.167	0.776	254	3.705	0.895	3.833	0.0002	0.551	Medium
Guizhou vs Other Regions	Preference_BroochB	66	3.167	0.815	254	3.362	0.845	-1.687	0.0926	-0.236	Small
Association	Chi2	df	p	Cramer's_V	N
Familiarity × Brooch_A_Preference	15.654	4	0.0035	0.156	320
Region × Brooch_A_Preference	16.71	8	0.0333	0.162	320
Age_Group × Brooch_A_Preference	1.845	8	0.9854	0.054	320
Gender × Brooch_A_Preference	0.038	2	0.9813	0.011	320

[truncated: 1 more sheets: Analysis_Formulae]
